# Supplementary material for: Impacts of Wet Market Modernization Levels and Hygiene Practices on the Microbiome and Microbial Safety of Wooden Cutting Boards in Hong Kong
Source: MDPI journal article supplement (doi:10.3390/microorganisms8121941), 2020-12-07
Supplement: s1 [file s1]

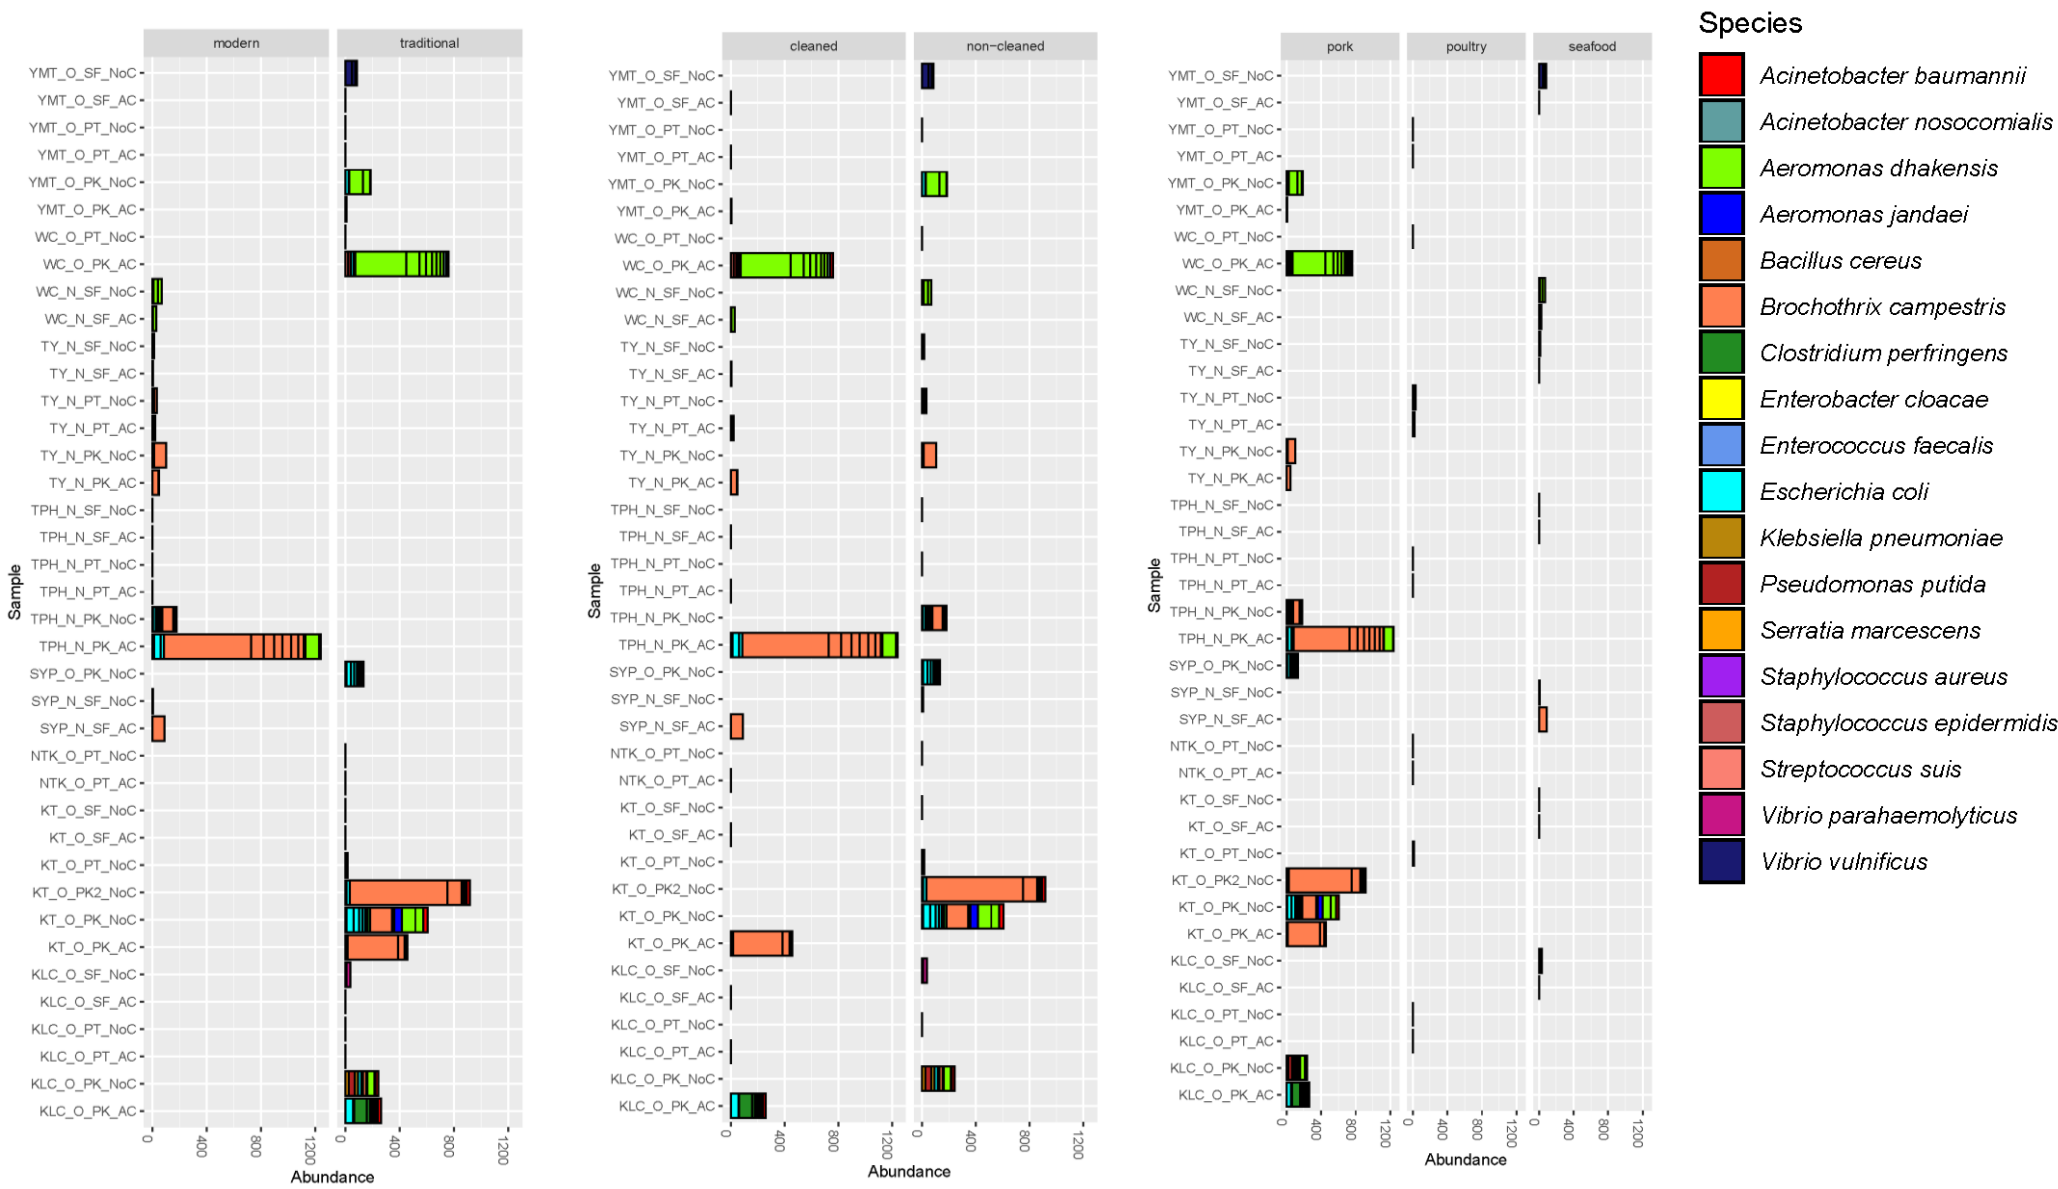

Supplementary Fig. 6. Relative species-level abundance of bacteria in samples from wooden cutting boards: a) traditional Vs modern, b) cleaned Vs non-cleaned c) different food groups (pork, poultry, seafood).
