# Supplementary material for: Impacts of Wet Market Modernization Levels and Hygiene Practices on the Microbiome and Microbial Safety of Wooden Cutting Boards in Hong Kong
Source: MDPI journal article supplement (doi:10.3390/microorganisms8121941), 2020-12-07
Supplement: s1 [file s1]

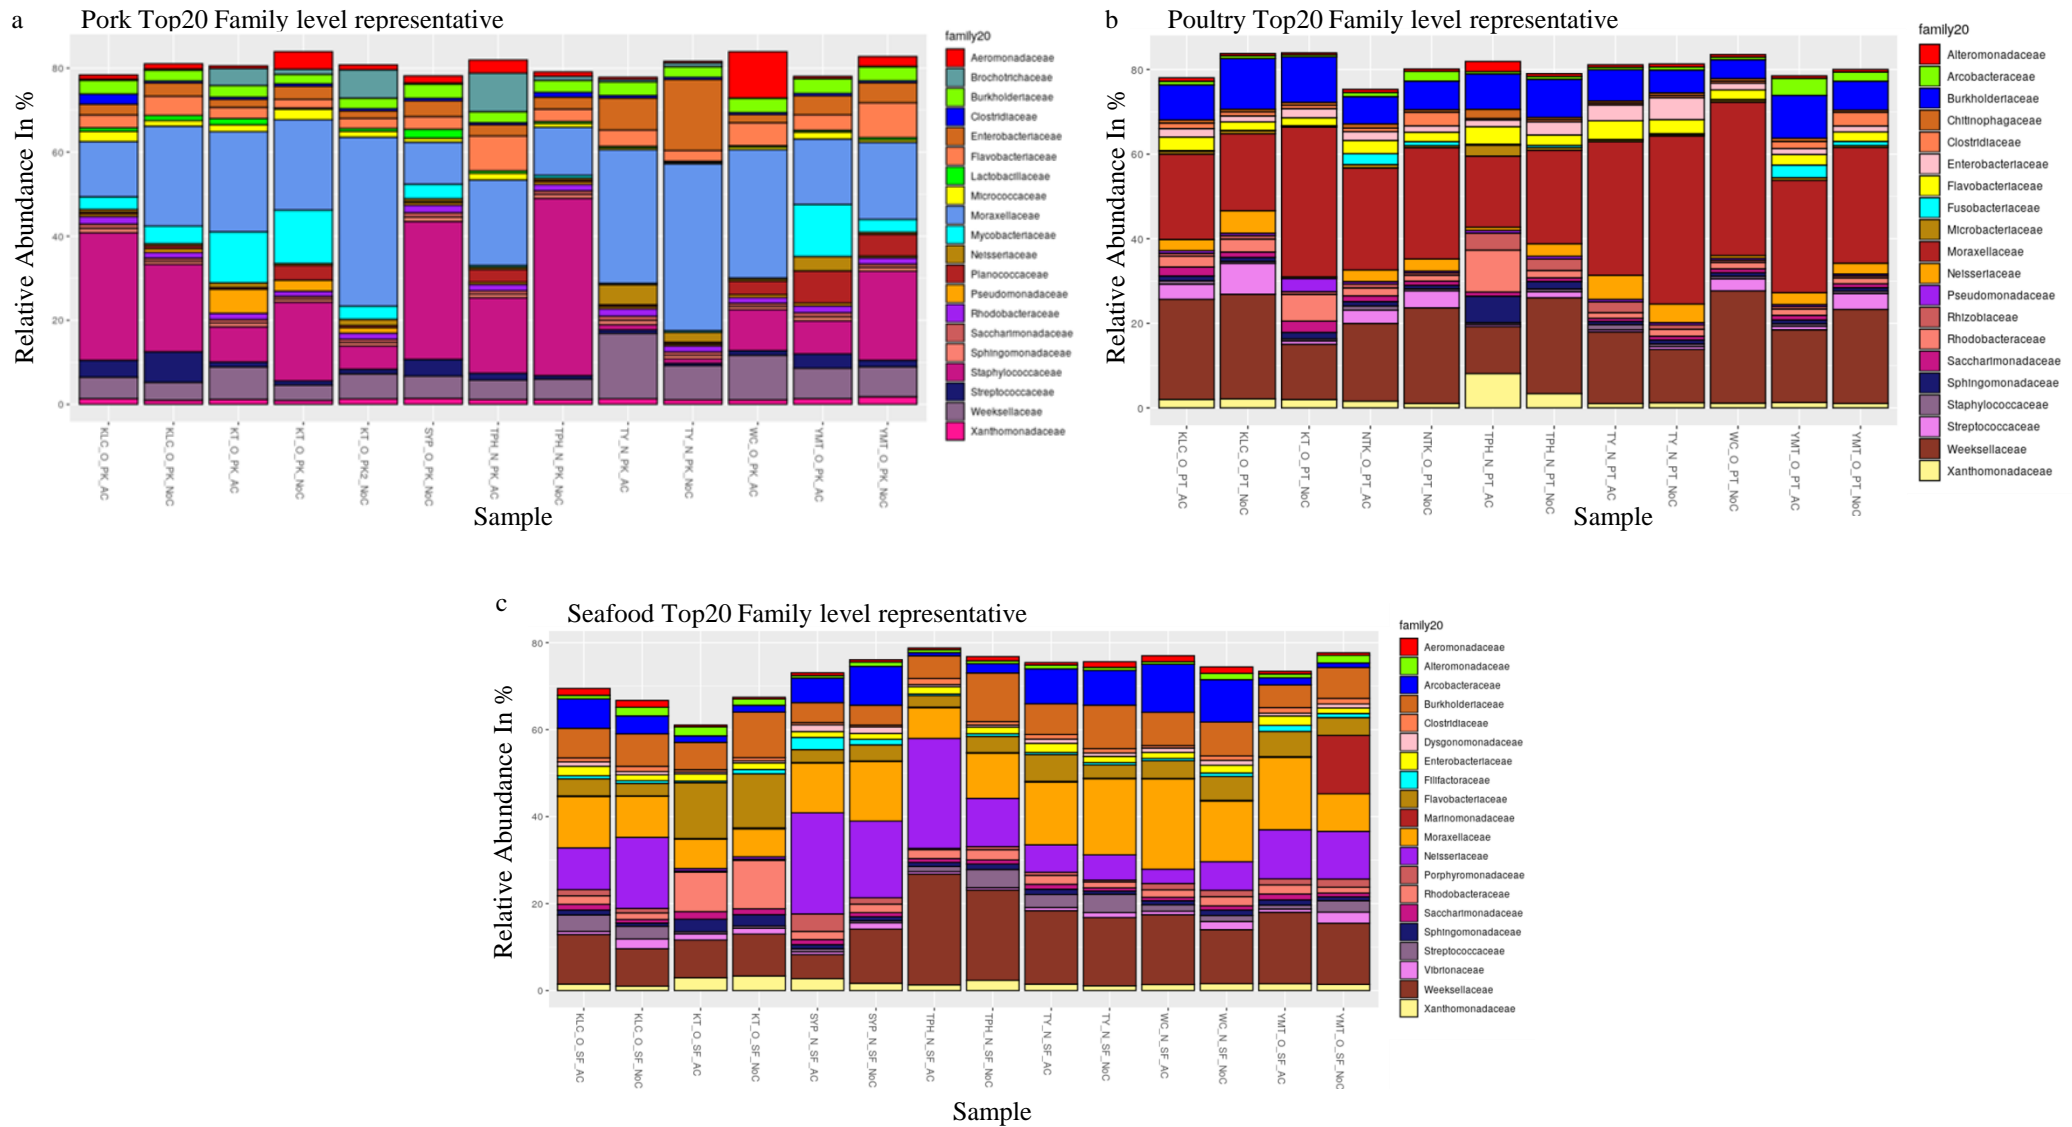

Supplementary Fig. 3. Relative abundance of top 20 families sampled from wooden cutting board processed for (a) pork; (b) poultry or (c) seafood processing cutting board.
