# Supplementary material for: Impacts of Wet Market Modernization Levels and Hygiene Practices on the Microbiome and Microbial Safety of Wooden Cutting Boards in Hong Kong
Source: MDPI journal article supplement (doi:10.3390/microorganisms8121941), 2020-12-07
Supplement: s1 [file s1]

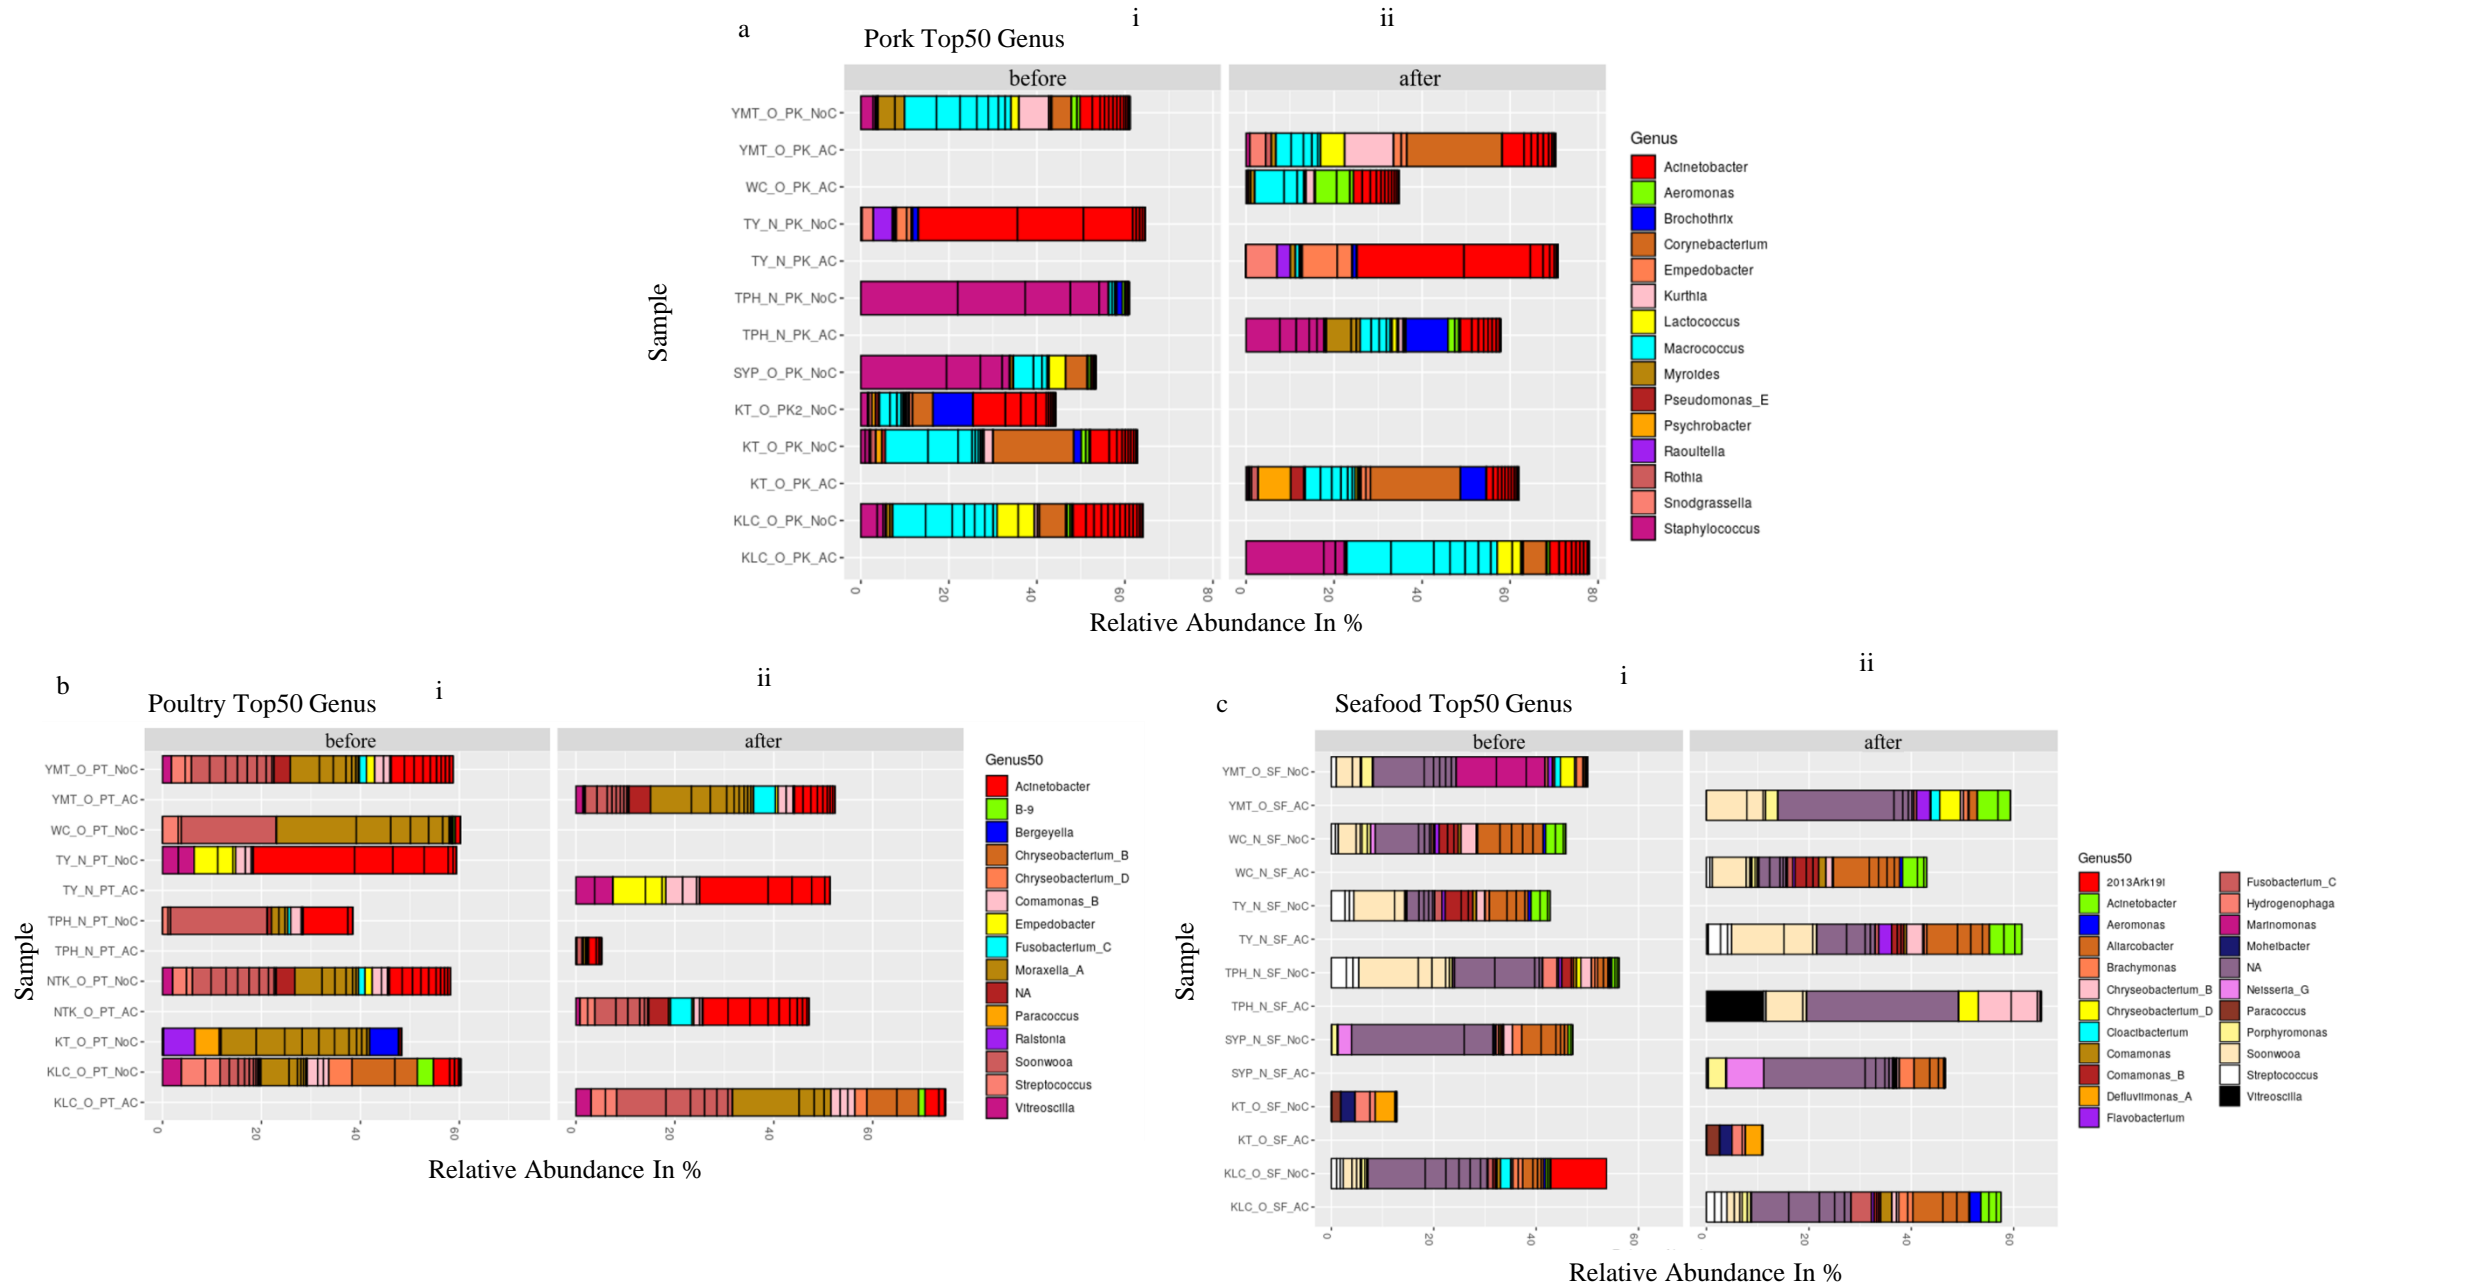

Supplementary Fig. 5. Relative abundance of top-50 genus sampled from wooden cutting board processed for a) pork; b) poultry and c) seafood. Left (i) represents samples before practicing cleaning. Right (ii) represents samples after practicing cleaning.
