# Supplementary material for: Impacts of Wet Market Modernization Levels and Hygiene Practices on the Microbiome and Microbial Safety of Wooden Cutting Boards in Hong Kong
Source: MDPI journal article supplement (doi:10.3390/microorganisms8121941), 2020-12-07
Supplement: s1 [file s1]

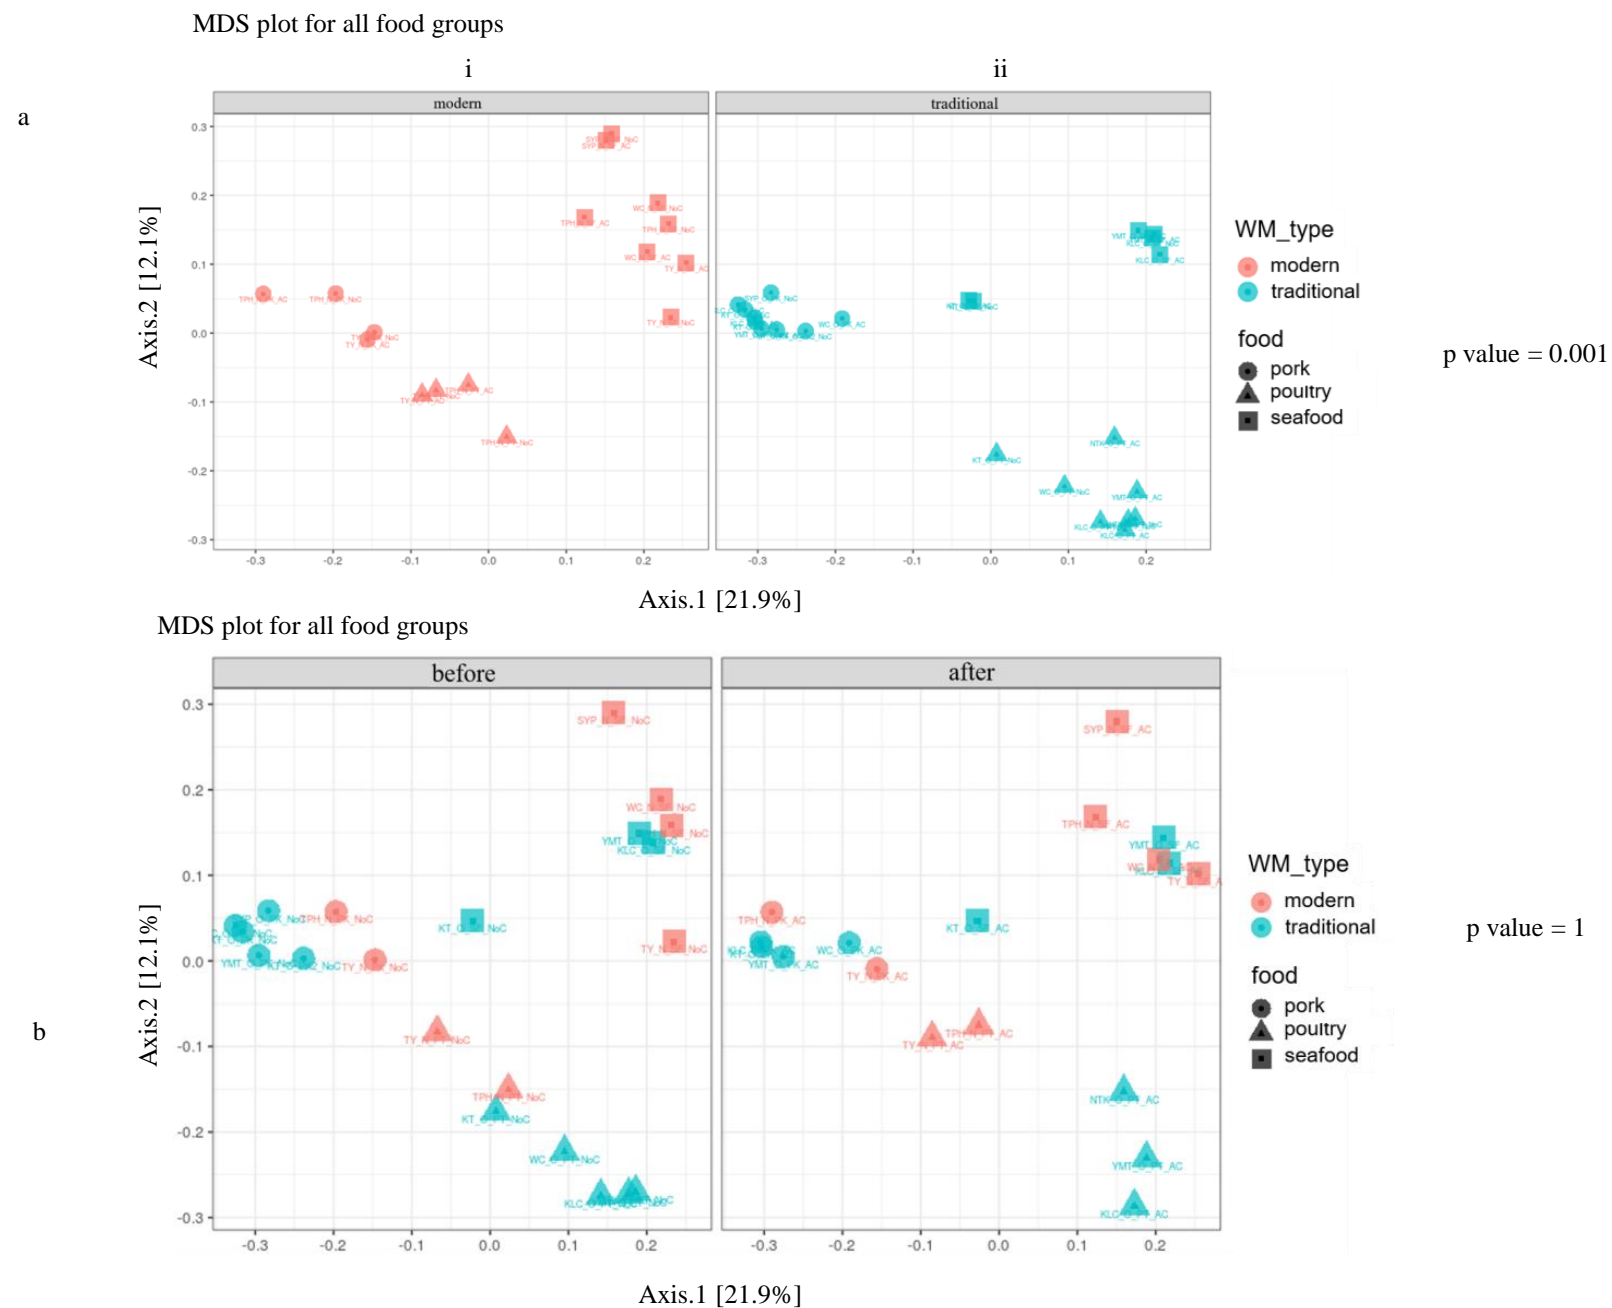

Supplementary Fig. 2. Multidimensional scaling (MDS) plot of samples separated by a) wet market type: i) modern wet market and ii) traditional wet market; b) cleaning practice: i) before cleaning and ii) after cleaning.
