# Supplementary figures and images for: Impacts of Wet Market Modernization Levels and Hygiene Practices on the Microbiome and Microbial Safety of Wooden Cutting Boards in Hong Kong
Source: MDPI journal article supplement (doi:10.3390/microorganisms8121941), 2020-12-07

a

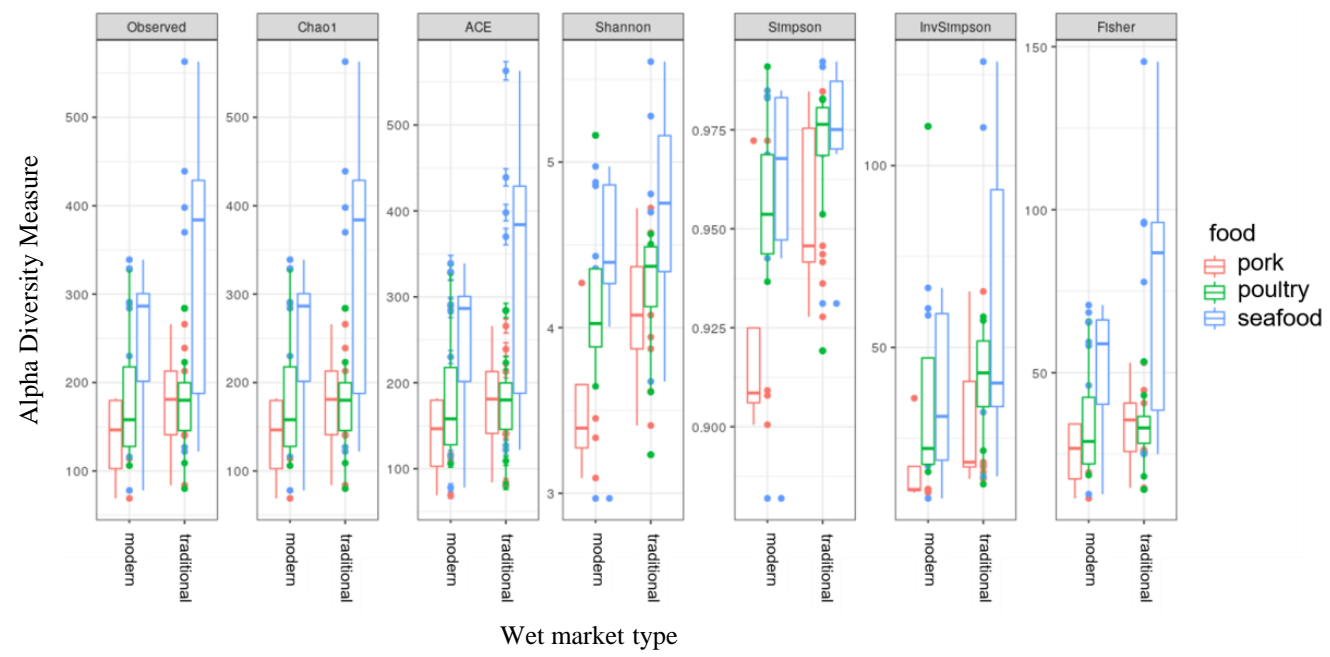

b

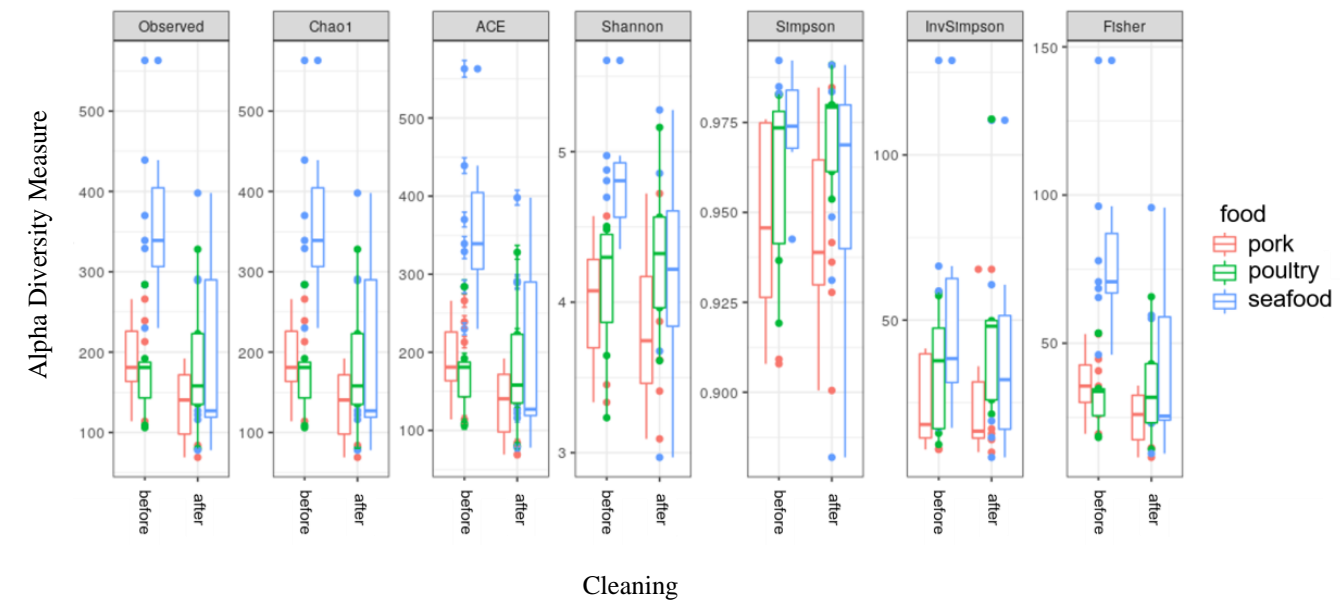

Supplementary Fig 1. Alpha diversity comparing by (a) wet market type; (b) cleaning conditions.

Supplement: s1 [file s1]
